# Supplementary material
Source: PubMed Central journal article supplement (PMC6351155)
Supplement: NIHMS1507664-supplement-Windebank_SDC_FINAL.pdf [file NIHMS1507664-supplement-Windebank_SDC_FINAL.pdf]

Supplemental digital content for Greenberg-Worisek AJ, Campbell KA, Klee EW, Staff NP, Schimmenti LA, Weavers KM, Ekker SC, and Windebank AJ. Case-Based Learning in Translational Biomedical Research Education Provides More Realistic and Adaptive Skills for Early-Career Scientists Than Didactic Sessions. Acad Med.

## Supplemental Digital Appendix 1

### Course Satisfaction Survey Template

Q1 Course Evaluation for Graduate School Students  $\{e://Field/COURSE\}$   
 $\{e://Field/INSTRUCTOR1\}$   $\{e://Field/INSTRUCTOR2\}$   $\{e://Field/INSTRUCTOR3\}$

This is your opportunity to give us feedback on our courses. By asking you to answer our questions, we promise to listen.

Q2 The " $\{e://Field/COURSE\}$ " course objectives were clear.

- Strongly disagree (1)
- Disagree (2)
- Somewhat disagree (3)
- Somewhat agree (4)
- Agree (5)
- Strongly agree (6)

Q3 Comments:

Q4 The " $\{e://Field/COURSE\}$ " course objectives were met.

- Strongly disagree (1)
- Disagree (2)
- Somewhat disagree (3)
- Somewhat agree (4)
- Agree (5)
- Strongly agree (6)

Q5 Comments:

Supplemental digital content for Greenberg-Worisek AJ, Campbell KA, Klee EW, Staff NP, Schimmenti LA, Weavers KM, Ekker SC, and Windebank AJ. Case-Based Learning in Translational Biomedical Research Education Provides More Realistic and Adaptive Skills for Early-Career Scientists Than Didactic Sessions. Acad Med.

Q6 The "\${e://Field/COURSE}" course material was presented clearly by the instructor(s).

- Strongly disagree (1)
- Disagree (2)
- Somewhat disagree (3)
- Somewhat agree (4)
- Agree (5)
- Strongly agree (6)

Q7 Comments:

Q8 The "\${e://Field/COURSE}" course assignments were clear.

- Strongly disagree (1)
- Disagree (2)
- Somewhat disagree (3)
- Somewhat agree (4)
- Agree (5)
- Strongly agree (6)

Q9 Comments:

Q10 The "\${e://Field/COURSE}" course assignments were worth doing.

- Strongly disagree (1)
- Disagree (2)
- Somewhat disagree (3)
- Somewhat agree (4)
- Agree (5)
- Strongly agree (6)

Q11 Comments:

Supplemental digital content for Greenberg-Worisek AJ, Campbell KA, Klee EW, Staff NP, Schimmenti LA, Weavers KM, Ekker SC, and Windebank AJ. Case-Based Learning in Translational Biomedical Research Education Provides More Realistic and Adaptive Skills for Early-Career Scientists Than Didactic Sessions. Acad Med.

Q12 Throughout the "\${e://Field/COURSE}" course the assessment of my work was fair.

- Strongly disagree (1)
- Disagree (2)
- Somewhat disagree (3)
- Somewhat agree (4)
- Agree (5)
- Strongly agree (6)
- Not applicable (7)

Q13 Comments:

Q14 My assignments were graded in a timely manner throughout the "\${e://Field/COURSE}" course.

- Strongly disagree (1)
- Disagree (2)
- Somewhat disagree (3)
- Somewhat agree (4)
- Agree (5)
- Strongly agree (6)

Q15 Comments:

Supplemental digital content for Greenberg-Worisek AJ, Campbell KA, Klee EW, Staff NP, Schimmenti LA, Weavers KM, Ekker SC, and Windebank AJ. Case-Based Learning in Translational Biomedical Research Education Provides More Realistic and Adaptive Skills for Early-Career Scientists Than Didactic Sessions. Acad Med.

Q16 How difficult was the "\${e://Field/COURSE}" course?

- Very easy (1)
- Easy (2)
- Average (3)
- Difficult (4)
- Very difficult (5)

Q17 Comments:

Q18 How much did you learn during the "\${e://Field/COURSE}" course?

- Nothing (1)
- A little bit (2)
- Average (3)
- A lot (4)
- Incredible amount (5)

Q19 Comments:

Q20 The "\${e://Field/COURSE}" course was well worth the effort you put into it.

- Strongly disagree (1)
- Disagree (2)
- Somewhat disagree (3)
- Somewhat agree (4)
- Agree (5)
- Strongly agree (6)

Q21 Comments:

Supplemental digital content for Greenberg-Worisek AJ, Campbell KA, Klee EW, Staff NP, Schimmenti LA, Weavers KM, Ekker SC, and Windebank AJ. Case-Based Learning in Translational Biomedical Research Education Provides More Realistic and Adaptive Skills for Early-Career Scientists Than Didactic Sessions. Acad Med.

Q22 On average, how many hours a week outside of class did you spend on the "\${e://Field/COURSE}" course?

- 0 to 2 (1)
- 3 to 5 (2)
- 6 to 8 (3)
- 9 or more (4)

Q23 Comments:

Q24 The "\${e://Field/COURSE}" course was well integrated (eg, logical sequence, not repetitive).

- Strongly disagree (1)
- Disagree (2)
- Somewhat disagree (3)
- Somewhat agree (4)
- Agree (5)
- Strongly agree (6)

Q25 Comments:

Q26 Student discussion and/or interactions were facilitated or encouraged during the "\${e://Field/COURSE}" course.

- Strongly disagree (1)
- Disagree (2)
- Somewhat disagree (3)
- Somewhat agree (4)
- Agree (5)
- Strongly agree (6)

Q27 Comments:

Supplemental digital content for Greenberg-Worisek AJ, Campbell KA, Klee EW, Staff NP, Schimmenti LA, Weavers KM, Ekker SC, and Windebank AJ. Case-Based Learning in Translational Biomedical Research Education Provides More Realistic and Adaptive Skills for Early-Career Scientists Than Didactic Sessions. Acad Med.

Q28 Computer/technical problems presented a significant challenge during the "\${e://Field/COURSE}" course. (Please explain your response in the comment section.)

- Not applicable (1)
- Strongly disagree (2)
- Disagree (3)
- Somewhat disagree (4)
- Somewhat agree (5)
- Agree (6)
- Strongly agree (7)

Q29 Comments:

Q30 The "\${e://Field/COURSE}" course was easy to navigate in Blackboard. (Please explain your response in the comment section.)

- Not applicable (1)
- Strongly disagree (2)
- Disagree (3)
- Somewhat disagree (4)
- Somewhat agree (5)
- Agree (6)
- Strongly agree (7)

Q31 Comments:

Q32 Is there anything you would recommend changing about the design or layout of the "\${e://Field/COURSE}" course in Blackboard?

Supplemental digital content for Greenberg-Worisek AJ, Campbell KA, Klee EW, Staff NP, Schimmenti LA, Weavers KM, Ekker SC, and Windebank AJ. Case-Based Learning in Translational Biomedical Research Education Provides More Realistic and Adaptive Skills for Early-Career Scientists Than Didactic Sessions. Acad Med.

Q33 What grade would you give the "\${e://Field/COURSE}" course?

- A (4)
- B (3)
- C (2)
- D (1)
- F (0)

Q34 Comments:

Q35 If the "\${e://Field/COURSE}" course had 1 or more teaching assistants please provide the name(s) of the teaching assistant(s), the grade(s) you gave him/her, and reason for the grade.

Supplemental digital content for Greenberg-Worisek AJ, Campbell KA, Klee EW, Staff NP, Schimmenti LA, Weavers KM, Ekker SC, and Windebank AJ. Case-Based Learning in Translational Biomedical Research Education Provides More Realistic and Adaptive Skills for Early-Career Scientists Than Didactic Sessions. Acad Med.

Q36 Please assign a grade for the instructor(s) of the "{\$e://Field/COURSE}" course and comment on what you liked and/or what can be improved.

|                                  | GRADE                 |                       |                       |                       |                       | COMMENTS<br>(1) |
|----------------------------------|-----------------------|-----------------------|-----------------------|-----------------------|-----------------------|-----------------|
|                                  | A (4)                 | B (3)                 | C (2)                 | D (1)                 | F (0)                 |                 |
| {\$e://Field/INSTRUCTOR1}<br>(1) | <input type="radio"/> |                 |
| {\$e://Field/INSTRUCTOR2}<br>(2) | <input type="radio"/> |                 |
| {\$e://Field/INSTRUCTOR3}<br>(3) | <input type="radio"/> |                 |

Q37 Do you recommend that the following instructor(s) of the "{\$e://Field/COURSE}" course be considered for the EDUCATOR of the YEAR award?

|                                  | Consider for the EDUCATOR of the YEAR award? |                       | Please provide the reason for considering this instructor for the EDUCATOR of the YEAR award.<br>(1) |
|----------------------------------|----------------------------------------------|-----------------------|------------------------------------------------------------------------------------------------------|
|                                  | Yes (1)                                      | No (2)                |                                                                                                      |
| {\$e://Field/INSTRUCTOR1}<br>(1) | <input type="radio"/>                        | <input type="radio"/> |                                                                                                      |
| {\$e://Field/INSTRUCTOR2}<br>(2) | <input type="radio"/>                        | <input type="radio"/> |                                                                                                      |
| {\$e://Field/INSTRUCTOR3}<br>(3) | <input type="radio"/>                        | <input type="radio"/> |                                                                                                      |



Supplemental digital content for Greenberg-Worisek AJ, Campbell KA, Klee EW, Staff NP, Schimmenti LA, Weavers KM, Ekker SC, and Windebank AJ. Case-Based Learning in Translational Biomedical Research Education Provides More Realistic and Adaptive Skills for Early-Career Scientists Than Didactic Sessions. Acad Med.

Q38 Please tell us about negative aspects of the "{\$e://Field/COURSE}" course.

Q39 Please tell us about positive aspects of the "{\$e://Field/COURSE}" course.

Q40 THANK YOU PLEASE CLICK "SUBMIT" TO RECORD YOUR RESPONSES
